# Supplementary material for: Phase transition with in situ exsolution nanoparticles in the reduced Pr0.5Ba0.5Fe0.8Ni0.2O3−δ electrode for symmetric solid oxide cells
Source: Royal Society of Chemistry journal article supplement (doi:10.1039/d2ta03395j), 2022-01-01
Supplement: d2ta03395j1.pdf [file d2ta03395j1.pdf]

## Supplementary information for

### **Phase transition with in-situ exsolution nanoparticles in reduced $\text{Pr}_{0.5}\text{Ba}_{0.5}\text{Fe}_{0.8}\text{Ni}_{0.2}\text{O}_{3-6}$ electrode for symmetric solid oxide cells**

Yunfeng Tian<sup>a, b</sup>, Caichen Yang<sup>c</sup>, Yuhao Wang<sup>a</sup>, Min Xu<sup>d</sup>, Yihan Ling<sup>b</sup>, Jian Pu<sup>c</sup>, Francesco Ciucci<sup>a,</sup>

<sup>e, f, g, h\*</sup>, John T.S. Irvine<sup>d</sup>, Bo Chi<sup>c\*</sup>

*a. Department of Mechanical and Aerospace Engineering, The Hong Kong University of Science and Technology, Clear Water Bay, Hong Kong SAR, China.*

*b. School of Materials Science and Physics, China University of Mining and Technology, Xuzhou 221116, China.*

*c. Center for Fuel Cell Innovation, School of Materials Science and Engineering, Huazhong University of Science and Technology, Wuhan 430074, China.*

*d. School of Chemistry, University of St Andrews, St Andrews, Fife, KY16 9ST Scotland, UK.*

*e. Department of Chemical and Biological Engineering, The Hong Kong University of Science and Technology, Clear Water Bay, Hong Kong SAR, China*

*f. HKUST Shenzhen-Hong Kong Collaborative Innovation Research Institute, Shenzhen, China.*

*g. HKUST Energy Institute, The Hong Kong University of Science and Technology, Hong Kong SAR, China.*

*h. Guangzhou HKUST Fok Ying Tung Research Institute, Nansha, Guangzhou 511458, China.*

*\*Corresponding authors*

*E-mail: [francesco.ciucci@ust.hk](mailto:francesco.ciucci@ust.hk) (Francesco Ciucci)*

*[chibo@hust.edu.cn](mailto:chibo@hust.edu.cn) (Bo Chi)*

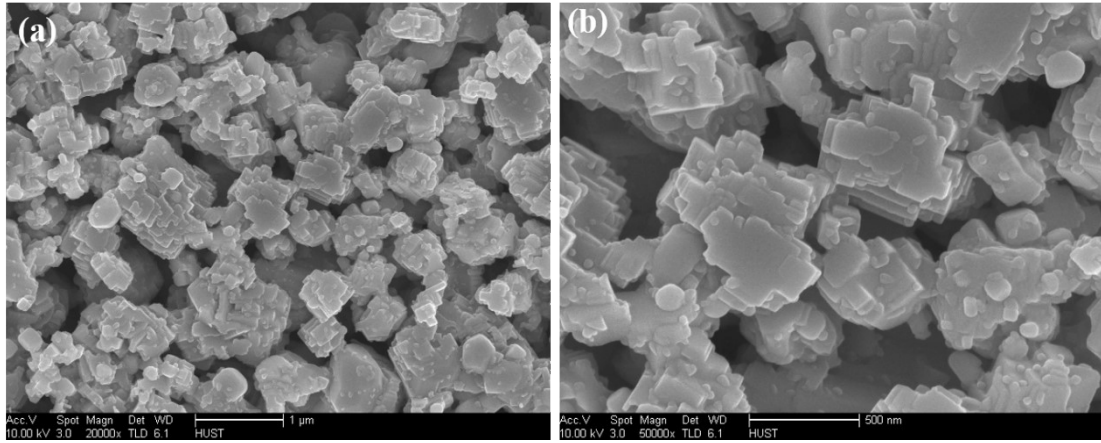

**Figure S1.** Micro-scale diagram of PBFN electrode after reduction.

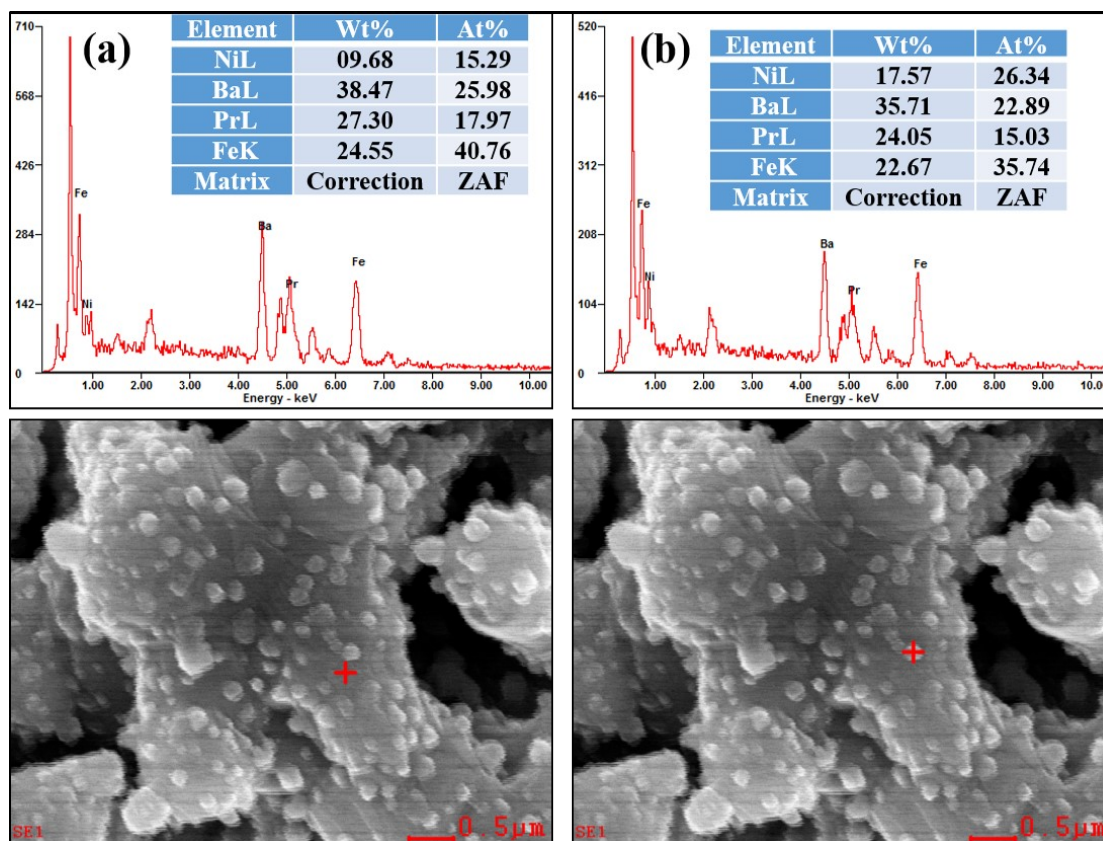

**Figure S2.** Microstructure of reduced PBFN electrode and the EDS analysis of the matrix (a) and exsolved nanoparticles (b).

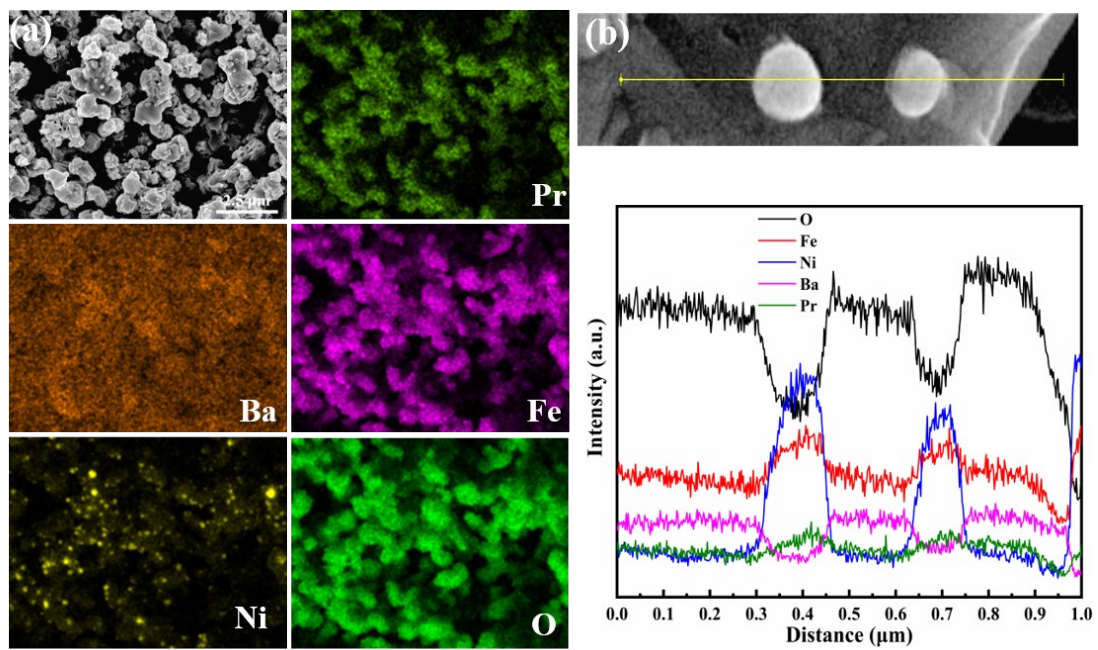

**Figure S3.** (a) EDS mapping of R-PBFN and (b) line scan of R-PBFN.

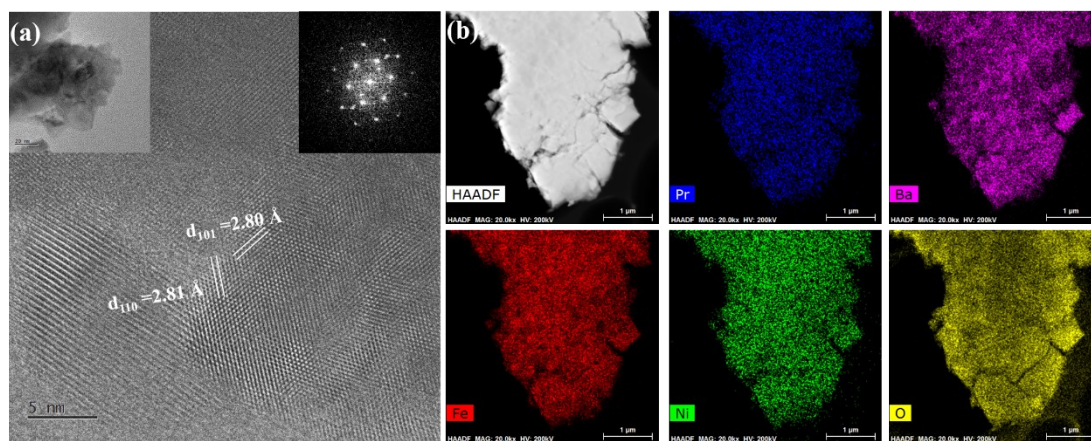

**Figure S4.** (a) HRTEM of PBFN, and (b) EDS map of PBFN.

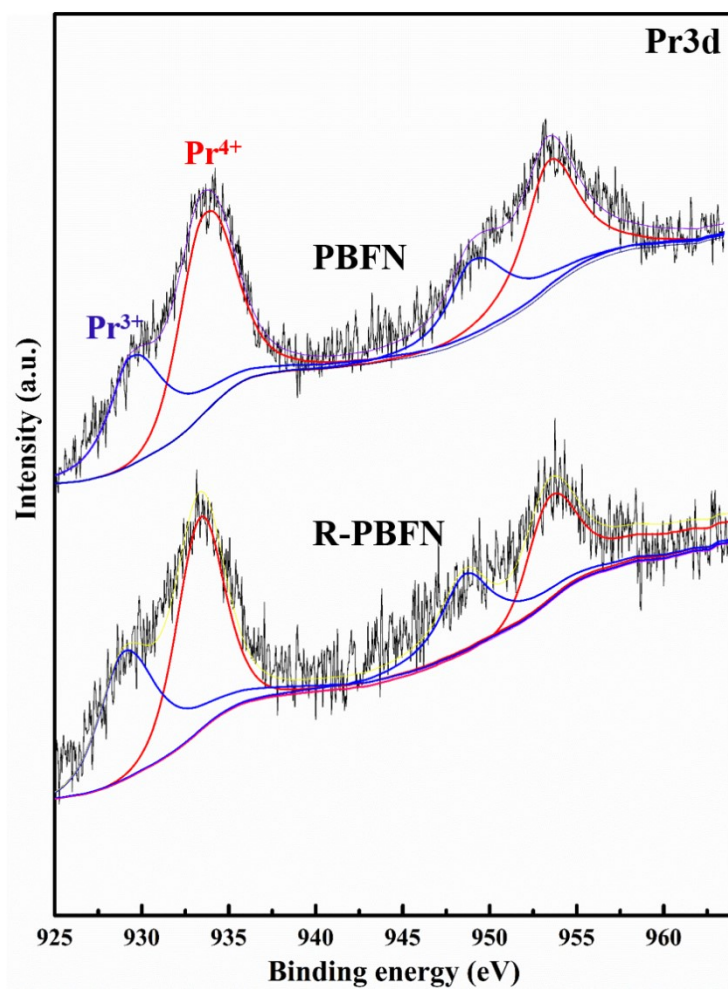

Figure S5. XPS spectra of Pr 3d.

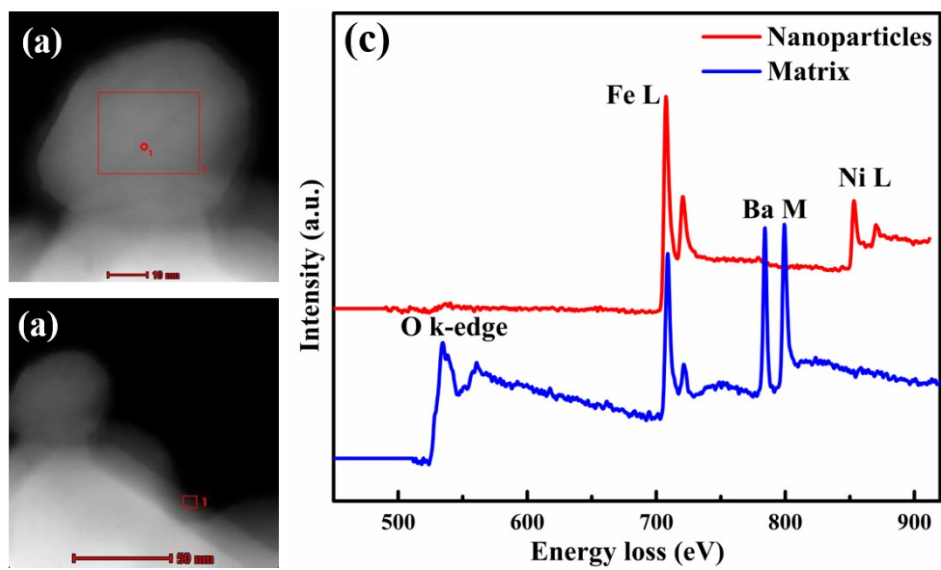

**Figure S6.** TEM images of R-PBFN, (a) nanoparticles, (b) matrix and corresponding EELS profiles (c).

**Table S1.** Electrochemical performance for symmetrical electrodes under H<sub>2</sub> fuel conditions in SOFC mode.

| Electrode                                                                                    | Electrolyte | Thickness<br>( $\mu\text{m}$ ) | Temperature<br>( $^{\circ}\text{C}$ ) | MPD<br>( $\text{mW}/\text{cm}^2$ ) | $R_p@OCV$<br>( $\Omega \cdot \text{cm}^2$ ) | $R_p@air$    | $R_p@H_2$    | Ref              |
|----------------------------------------------------------------------------------------------|-------------|--------------------------------|---------------------------------------|------------------------------------|---------------------------------------------|--------------|--------------|------------------|
| $\text{La}_{0.8}\text{Sr}_{0.2}\text{Sc}_{0.2}\text{Mn}_{0.8}\text{O}_3$                     | SSZ         | 300                            | 900                                   | 310                                |                                             | 0.3          |              | [1]              |
| $\text{LaSr}_2\text{Fe}_2\text{CrO}_9$                                                       | LSGM        | 500                            | 800                                   | 264                                | 0.454                                       | 0.24         | 0.36         | [2]              |
| $\text{La}_{0.3}\text{Sr}_{0.7}\text{Fe}_{0.7}\text{Cr}_{0.3}\text{O}_3$                     | LSGM        | 500                            | 800                                   | 300                                |                                             | 0.1          | 0.4          | [3]              |
| $\text{La}_{0.7}\text{Ca}_{0.3}\text{CrO}_3$                                                 | YSZ         | 350                            | 850                                   | 92.1                               | 2.17                                        | 0.15         |              | [4]              |
| $\text{Pr}_{0.7}\text{Ca}_{0.3}\text{Cr}_{1-y}\text{Mn}_y\text{O}_3$                         | YSZ         | 370                            | 950                                   | 250                                |                                             |              | 1.5          | [5]              |
| $\text{La}_4\text{Sr}_8\text{Ti}_{12-x}\text{Fe}_x\text{O}_{38-\delta}$                      | YSZ         | 1000                           | 900                                   | 70                                 |                                             |              | 0.2          | [6]              |
| $\text{PrBaMn}_2\text{O}_{5+\delta}$                                                         | YSZ         | 300                            | 800                                   | 245                                | 0.3                                         | 0.02         |              | [7]              |
| $\text{La}_{0.6}\text{Sr}_{1.4}\text{MnO}_{4+\delta}$                                        | SDC         | 300                            | 800                                   | 294                                |                                             | 0.46         | 0.19         | [8]              |
| $\text{La}_{0.7}\text{Ca}_{0.3}\text{Cr}_{0.8}\text{Ni}_{0.2}\text{O}_{3-\delta}$            | LSGM        | 400                            | 800                                   | 254                                |                                             |              | 0.08         | [9]              |
| $\text{Sm}_{0.95}\text{Ce}_{0.05}\text{FeO}_3$                                               | YSZ         | 700                            | 800                                   | 130                                |                                             | 0.15         |              | [10]             |
| $\text{La}_{0.6}\text{Ca}_{0.4}\text{Fe}_{0.8}\text{Ni}_{0.2}\text{O}_3$                     | SDC         | 280                            | 800                                   | 140                                |                                             | 0.15         |              | [11]             |
| $\text{La}_{0.8}\text{Sr}_{0.2}\text{Fe}_{0.8}\text{Cu}_{0.2}\text{O}_3$                     | LSGM        | 300                            | 800                                   | 203                                | 0.6                                         |              | 0.24         | [12]             |
| $\text{Sm}_{0.9}\text{Sr}_{0.1}\text{Fe}_{0.9}\text{Ru}_{0.1}\text{O}_{3-\delta}$            | SDC         | 600                            | 800                                   | 119.69                             |                                             | 0.3          | 0.93         | [13]             |
| $\text{La}_{0.8}\text{Sr}_{1.2}\text{Fe}_{0.9}\text{Co}_{0.1}\text{O}_4$                     | LSGM        | 300                            | 800                                   | 237                                |                                             | 0.21         |              | [14]             |
| <b><math>\text{R-Pr}_{0.5}\text{Ba}_{0.5}\text{Fe}_{0.8}\text{Ni}_{0.2}\text{O}_3</math></b> | <b>YSZ</b>  | <b>300</b>                     | <b>800</b>                            | <b>300</b>                         | <b>0.256</b>                                | <b>0.108</b> | <b>0.101</b> | <b>This work</b> |



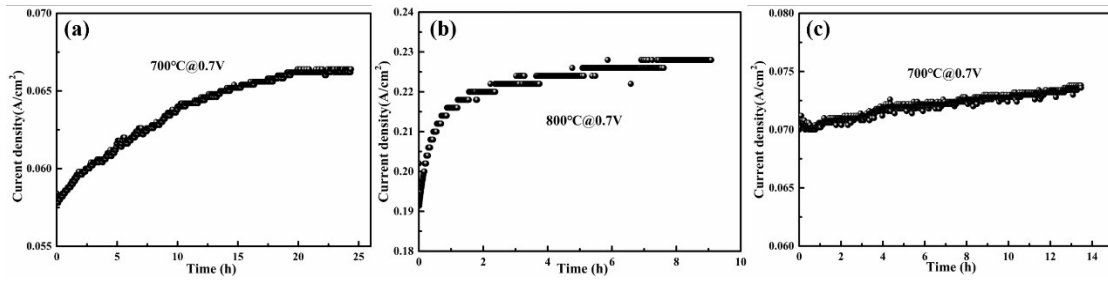

**Figure S7.** The short stability test in SOFC mode, first at 700 °C@0.7 V(a), then increasing to 800 °C (b) and decreasing to 700 °C (c).

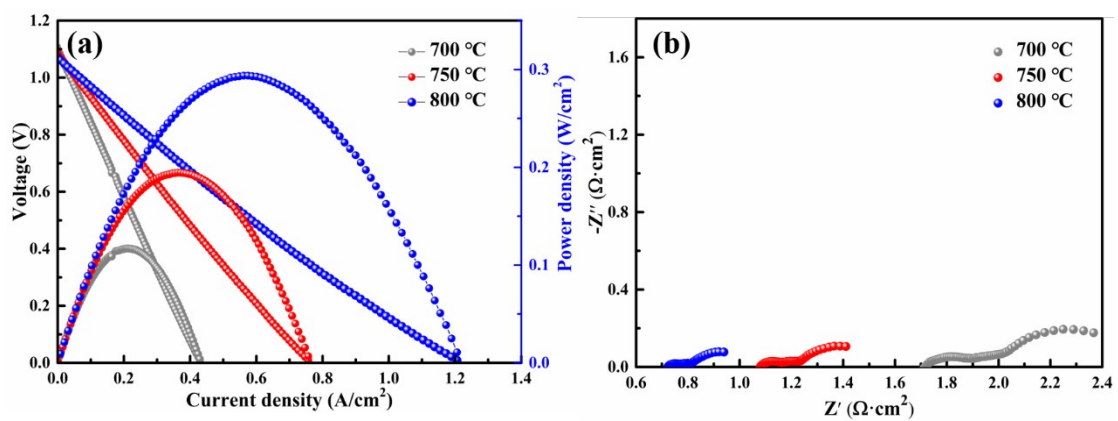

**Figure S8.** Symmetrical cell performance in wet hydrogen at various temperatures with R-PBFN electrode (a) I-V-P plot and EIS curves (b).



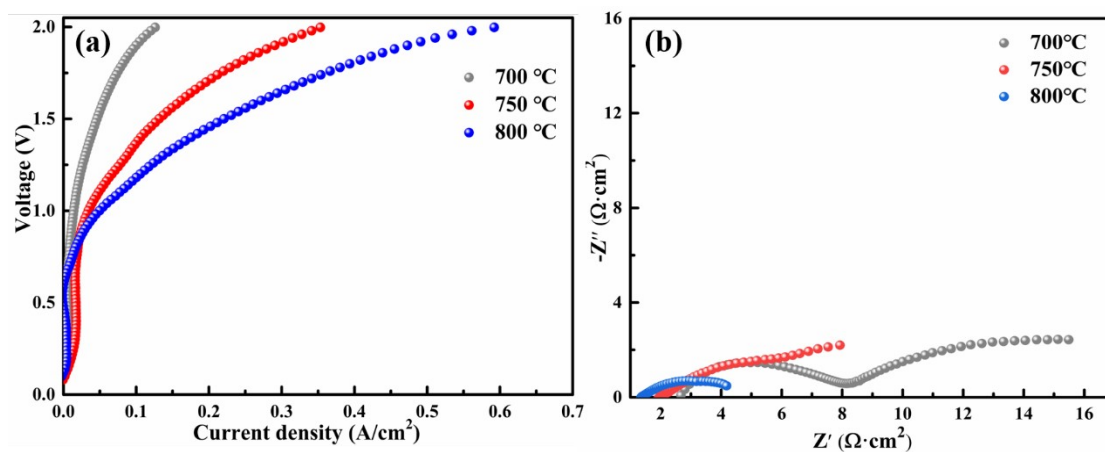

**Figure S9.** I-V curves (a) and EIS (b) of the PBFN based SSOC for pure CO<sub>2</sub> electrolysis at different temperatures.

## REFERENCES

1. Y. Zheng; C. Zhang; R. Ran; R. Cai; Z. Shao; D. Farrusseng, *Acta Mater* **2009**, *57* (4), 1165-1175.
2. Q. Zhou; C. Yuan; D. Han; T. Luo; J. Li; Z. Zhan, *Electrochim. Acta* **2014**, *133*, 453-458.
3. M. Chen; S. Paulson; V. Thangadurai; V. Birss, *J. Power Sources* **2013**, *236*, 68-79.
4. B. Lin; S. Wang; X. Liu; G. Meng, *J Alloy Compd* **2010**, *490* (1-2), 214-222.
5. A. El-Himri; D. Marrero-López; J. C. Ruiz-Morales; J. Peña-Martínez; P. Núñez, *J. Power Sources* **2009**, *188* (1), 230-237.
6. J. Canales-Vázquez; J. C. Ruiz-Morales; D. Marrero-López; J. Peña-Martínez; P. Núñez; P. Gómez-Romero, *J. Power Sources* **2007**, *171* (2), 552-557.
7. Y. Gu; Y. Zhang; Y. Zheng; H. Chen; L. Ge; L. Guo, *Appl Catal B: Environ* **2019**, *257*, 117868.
8. J. Shen; G. Yang; Z. Zhang; W. Zhou; W. Wang; Z. Shao, *J. Mater. Chem. A* **2016**, *4* (27), 10641-10649.
9. M. K. Rath; K.-T. Lee, *Ceram Inter* **2015**, *41* (9), 10878-10890.
10. W. Fan; Z. Sun; J. Wang; J. Zhou; K. Wu; Y. Cheng, *J. Power Sources* **2016**, *312*, 223-233.
11. X. Ding; H. Liu; Z. Gao; G. Hua; L. Wang; L. Ding; G. Yuan, *Int. J. Hydrogen Energy* **2017**, *42* (39), 24968-24977.
12. F. Zurlo; I. Natali Sora; V. Felice; I. Luisetto; C. D'Ottavi; S. Licocchia; E. Di Bartolomeo, *Acta Mater* **2016**, *112*, 77-83.
13. W. Fan; Z. Sun; J. Zhou; K. Wu; Y. Cheng, *J. Power Sources* **2017**, *348*, 94-106.
14. J. Zhou; T.-H. Shin; C. Ni; G. Chen; K. Wu; Y. Cheng; J. T. S. Irvine, *Chem. Mater* **2016**, *28* (9), 2981-2993.
15. S. Xu; S. Li; W. Yao; D. Dong; K. Xie, *J. Power Sources* **2013**, *230*, 115-121.
16. P. Addo; B. Molero-Sanchez; M. Chen; S. Paulson; V. Birss, *Fuel Cells* **2015**, *15* (5), 689-696.
17. Z. Cao; B. Wei; J. Miao; Z. Wang; Z. Lü; W. Li; Y. Zhang; X. Huang; X. Zhu; Q. Feng, *Electrochem Commun* **2016**, *69*, 80-83.
18. X. Peng; Y. Tian; Y. Liu; W. Wang; L. Jia; J. Pu; B. Chi; J. Li, *J CO<sub>2</sub> Utili* **2020**, *36*, 18-24.
19. L. Ye; M. Zhang; P. Huang; G. Guo; M. Hong; C. Li; J. T. Irvine; K. Xie, *Nat. Commun.* **2017**, *8*, 14785..
20. Y.-Q. Zhang; J.-H. Li; Y.-F. Sun; B. Hua; J.-L. Luo, *ACS Appl. Mater Inter* **2016**, *8* (10), 6457-6463.
21. Y. Zhou; Z. Zhou; Y. Song; X. Zhang; F. Guan; H. Lv; Q. Liu; S. Miao; G. Wang; X. Bao, *Nano energy* **2018**, *50*, 43-51.
